# Supplementary material for: Alterations of the Human Gut Microbiome in Chronic Kidney Disease
Source: PubMed Central journal article supplement (PMC7578882; doi:10.1002/advs.202001936), 2020-09-02
Supplement: ADVS-7-2001936-s001.pdf [file ADVS-7-2001936-s001.pdf]

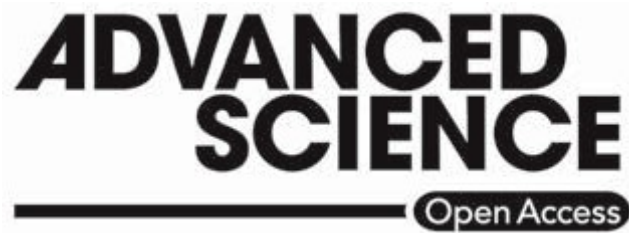

## Supporting Information

for *Adv. Sci.*, DOI: 10.1002/advs. 202001936

### **Alterations of the Human Gut Microbiome in Chronic Kidney Disease**

*Zhigang Ren, Yajuan Fan, Ang Li, Quanquan Shen, Jian Wu, Lingyan Ren, Haifeng Lu, Suying Ding, Hongyan Ren, Chao Liu, Wenli Liu, Dan Gao, Zhongwen Wu, Shiyuan Guo, Ge Wu,\* Zhangsuo Liu,\* Zujiang Yu,\* and Lanjuan Li\**

## Supplementary data legends

### Alterations of the human gut microbiome in chronic kidney disease

#### Authors

Zhigang Ren<sup>1, 10†</sup>, Yajuan Fan<sup>2†</sup>, Ang Li<sup>1, 7, 10†</sup>, Quanquan Shen<sup>3, 11†</sup>, Jian Wu<sup>4</sup>, Lingyan Ren<sup>5</sup>, Haifeng Lu<sup>6</sup>, Suying Ding<sup>7</sup>, Hongyan Ren<sup>8</sup>, Chao Liu<sup>8</sup>, Wenli Liu<sup>9</sup>, Dan Gao<sup>2</sup>, Zhongwen Wu<sup>6</sup>, Shiyuan Guo<sup>2</sup>, Ge Wu<sup>2\*</sup>, Zhangsuo Liu<sup>2\*</sup>, Zujiang Yu<sup>1, 10\*</sup>, and Lanjuan Li<sup>6\*</sup>

#### Affiliations

<sup>1</sup> Department of Infectious Diseases, the First Affiliated Hospital of Zhengzhou University, Zhengzhou 450052, China.

<sup>2</sup> Department of Nephrology, the First Affiliated Hospital of Zhengzhou University, Zhengzhou 450052, China.

<sup>3</sup> Department of Nephrology, Zhejiang Provincial People's Hospital, People's Hospital of Hangzhou Medical College, Hangzhou, Zhejiang 310014, China.

<sup>4</sup> College of Public Health, Zhengzhou University, Zhengzhou 450052, China.

<sup>5</sup> Department of Nephrology, the First Affiliated Hospital of Huzhou Teachers College, the First People's Hospital of Huzhou, Huzhou, Zhejiang 313000, China.

<sup>6</sup> State Key Laboratory for Diagnosis and Treatment of Infectious Disease; National Clinical Research Center for Infectious Diseases; Collaborative Innovation Center for Diagnosis and Treatment of Infectious Diseases, the First Affiliated Hospital, School of Medicine, Zhejiang University, Hangzhou 310003, China.

<sup>7</sup> Health Management Center, the First Affiliated Hospital of Zhengzhou University, Zhengzhou 450052, China.

<sup>8</sup> Shanghai Mobio Biomedical Technology Co., Ltd., Shanghai 201111, China.

<sup>9</sup> Clinical Laboratory Diagnostics, Medical Technology College, Beihua University, Jilin 132013, China.

<sup>10</sup> Gene Hospital of Henan Province; Precision Medicine Center, the First Affiliated Hospital of Zhengzhou University, Zhengzhou 450052, China.

<sup>11</sup> Department of Nephrology, Chun'an First People's Hospital, Hangzhou, Zhejiang, China.

† These authors contributed equally to this work.

**\*Corresponding to**

Ge Wu, Prof., M.D., Department of Nephrology, the First Affiliated Hospital of Zhengzhou University, No. 1, Jianshe East Road, Zhengzhou 450052, China. E-mail: fccwug@zzu.edu.cn.

Zhangsuo Liu, Ph.D, M.D., Department of Nephrology, the First Affiliated Hospital of Zhengzhou University, No. 1, Jianshe East Road, Zhengzhou 450052, China. E-mail: zhangsuoliu@zzu.edu.cn.

Zujiang Yu, Ph.D, M.D., Department of Infectious Diseases, the First Affiliated Hospital of Zhengzhou University, Zhengzhou 450052, China. E-mail: johnyuem@zzu.edu.cn.

Lanjuan Li, Prof., M.D., State Key Laboratory for Diagnosis and Treatment of Infectious Disease, the First Affiliated Hospital, School of Medicine, Zhejiang University, #79 Qingchun Road, Hangzhou 310003, China. E-mail: ljli@zju.edu.cn.

**Supplementary data S1-21:**

**Supplementary data S1.** Clinic data of all Chinese individuals in the discovery cohort (n=320), validation cohort (n=112) and independent diagnosis cohort (n=57).

**Supplementary data S2.** The detailed values of gut microbial diversity index and observed OTUs in the discovery cohort (210 healthy controls and 110 CKD).

**Supplementary data S3.** The relative abundance and distribution of the key 47 OTUs in the discovery cohort (210 healthy controls and 110 CKD).

**Supplementary data S4.** The abundance and composition at the phylum level of each

sample in the discovery cohort (210 healthy controls and 110 CKD).

**Supplementary data S5.** The different degree of phylum level (p value) between the healthy controls (n=210) and CKD (n=110) in the discovery cohort.

**Supplementary data S6.** The abundance and composition of each sample in the discovery cohort (210 healthy controls and 110 CKD) at the genus level.

**Supplementary data S7.** The different degree of genus level (p value) between the healthy controls (n=210) and CKD (n=110) in the discovery cohort.

**Supplementary data S8.** The corresponding LDA value and p value of the bio-makers in the discovery cohort (210 healthy controls and 110 CKD).

**Supplementary data S9.** The corresponding LDA value and p value of microbial community gene function for samples in the discovery cohort (210 healthy controls and 110 CKD).

**Supplementary data S10.** By random forest classifier model, the corresponding output value of each optimal microbial marker in the discovery cohort (210 healthy controls and 110 CKD).

**Supplementary data S11.** The corresponding POD value for each sample in the discovery cohort (210 healthy controls and 110 CKD).

**Supplementary data S12.** By random forest classifier model, the corresponding output value of each optimal microbial marker in the validation cohort (63 healthy controls and 49 CKD).

**Supplementary data S13.** The corresponding POD value for each sample in validation cohort (63 healthy controls and 49 CKD).

**Supplementary data S14.** By random forest classifier model, the corresponding output value of each optimal microbial marker in the independent diagnosis cohort (57 CKD from Hangzhou, china and 63 healthy controls from Zhengzhou, china).

**Supplementary data S15.** The corresponding POD value of each sample in the independent diagnosis cohort (57 CKD from Hangzhou, china and 63 healthy controls from Zhengzhou, china).

**Supplementary data S16.** The detailed values of gut microbial diversity index and

observed OTUs in Group A (26 patients of CKD 1-2 stage), Group B (36 patients of CKD 3-4 stage) and Group C (48 patients of CKD 5 stage).

**Supplementary data S17.** The different degree of phylum level (p value) among the Group A (26 patients of CKD 1-2 stage), Group B (36 patients of CKD 3-4 stage) and Group C (48 patients of CKD 5 stage).

**Supplementary data S18.** The different degree of genus level (p value) among the Group A (26 patients of CKD 1-2 stage), Group B (36 patients of CKD 3-4 stage) and Group C (48 patients of CKD 5 stage).

**Supplementary data S19.** The bacterial abundance and composition of each sample in Group A (26 patients of CKD 1-2 stage), Group B (36 patients of CKD 3-4 stage) and Group C (48 patients of CKD 5 stage).

**Supplementary data S20.** The data of canonical correspondence analysis (CCA) between gut microbiome and clinical indicators of CKD (n=110).

**Supplementary data S21.** The p value between OTUs and clinical indicators of CKD (n=110) obtained by spearman correlation analysis.
